# Supplementary material
Source: Springer Nature journal article supplement (https://www.springermedizin.de/resource/supplementary/13098_2012_182_MOESM4_ESM.pdf/9670664)
Supplement: MOESM4 [file 9670664]

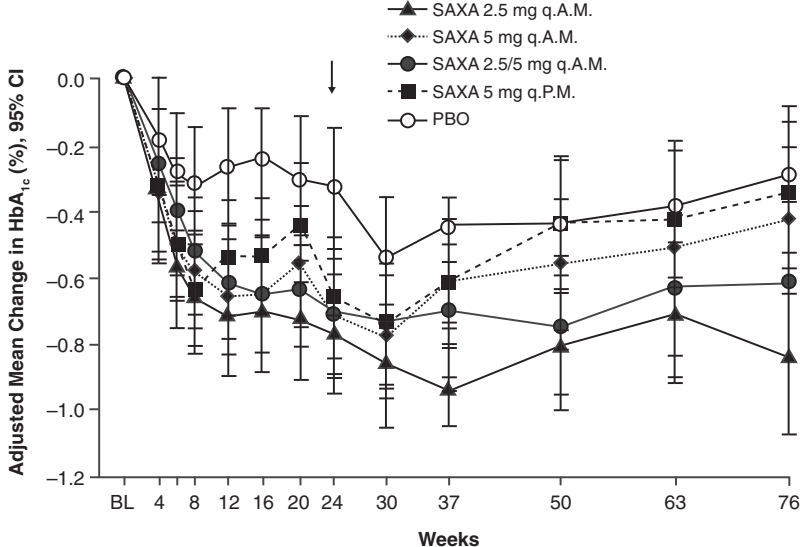

No. of pts with observed data:

|                       |    |    |    |    |
|-----------------------|----|----|----|----|
| SAXA 2.5 mg q.A.M.:   | 67 | 52 | 36 | 24 |
| SAXA 5 mg q.A.M.:     | 69 | 54 | 48 | 34 |
| SAXA 2.5/5 mg q.A.M.: | 69 | 49 | 38 | 28 |
| SAXA 5 mg q.P.M.:     | 70 | 54 | 43 | 26 |
| PBO:                  | 68 | 52 | 37 | 31 |

↓ = addition of metformin to PBO group at week 24.
